# Supplementary material for: The Predictors of High Dietary Salt Intake among Hypertensive Patients in Iran
Source: Int J Hypertens. 2020 Apr 7;2020:6748696. doi: 10.1155/2020/6748696 (PMC7168708; doi:10.1155/2020/6748696)
Supplement: Supplementary Materials — Additional file1: all raw data set (Data set.xls). [file 6748696.f1.xls]

## Sheet: Salt intake
ID	int	age	AgeCat	sex	schooling	educationyear	Education	occupation	occupation2	household	roomn	bedroom	TVset	refrigerator	freezer	dishwasher	laundry	vacuum	phon	mobile	computer	laptop	car	home	SES	SESLevel	drug	weight	length	BMI	BMI.Cat	waist	foodpreparation	knowledgesaltH	knowledgesaltsaltP	knowledge3.1	knowledge3.2	knowledge3.3	knowledge3.4	knowledge3.5	knowledge3.6	Practicesaltamount	Paddingintable	Pselfsaltintake	Psaltbuy	psalttimeamount	knowbreadsalt	knowligvanchees	knowwhitecheese
1	2	43	2	2	1	0	1	6	1	2	2	2	1	1	1	1	1	1	1	1	1	0	0	0	15	2	4	82	158	32.8473	4	95	1	0	0	1	1	1	1	1	0	1	1	4	2	1	0	0	0
2	2	61	5	1	1	0	1	4	2	2	2	2	1	1	1	1	1	1	1	1	1	0	0	0	15	2	4	98	175	32	4	110	2	0	0	1	0	0	0	1	0	1	1	3	2	1	0	0	0
3	2	61	5	2	1	0	1	6	1	4	3	1	1	1	1	0	0	1	1	1	0	0	0	1	15	2	1	71.5	155	29.7607	3	91	1	0	1	1	1	1	1	1	0	1	0	2	2	1	0	0	0
4	2	48	3	2	1	1	2	6	1	5	2	1	1	1	1	0	1	1	1	1	0	0	1	1	17	2	4	92	159	36.391	4	97	1	0	1	1	0	0	0	1	0	1	0	1	3	2	0	1	0
5	2	48	3	2	1	3	2	6	1	2	2	1	1	1	0	0	1	1	1	1	0	0	0	1	12	1	2	90	163	33.8741	4	96	1	0	0	1	0	1	1	1	0	1	1	3	2	1	0	1	0
6	2	50	3	1	1	5	2	7	2	2	2	2	1	1	0	0	0	0	1	1	0	0	0	1	11	1	0	81	169	28.3604	3	99	2	0	0	1	0	1	1	1	0	1	1	2	2	1	0	1	0
7	2	52	3	1	1	5	2	4	2	2	2	1	1	1	0	0	1	1	1	1	1	0	1	1	14	1	2	100	179	31.21	4	100	2	0	0	1	1	1	1	1	0	0	0	4	2	1	1	1	1
8	2	45	3	2	1	5	2	6	1	3	2	1	1	1	1	0	0	1	1	1	1	0	0	1	14	1	1	70	160	27.3437	3	86	1	0	0	1	1	1	1	1	0	0	1	4	2	1	1	1	1
9	2	48	3	2	1	0	1	6	1	4	1	2	1	1	0	0	0	0	0	1	0	0	0	0	10	1	4	65	157	26.3702	3	80	1	0	0	1	0	0	0	0	0	0	0	1	2	1	0	1	1
10	2	31	1	2	1	3	2	6	1	3	1	2	1	1	0	0	0	0	0	0	0	0	0	1	9	1	6	79	163	29.7339	3	85	1	0	0	1	1	1	1	1	1	0	1	5	2	1	0	0	0
11	2	56	4	2	1	4	2	6	1	2	1	1	1	1	0	0	1	1	1	1	0	0	1	1	12	1	3	83	159	32.831	4	97	1	0	0	1	1	1	1	1	1	1	0	1	3	2	0	1	0
12	2	46	3	2	1	0	1	6	1	3	1	1	1	1	1	0	1	1	1	1	0	0	1	1	14	1	1	76	158	30.4438	4	100	1	0	0	1	0	0	0	1	0	0	0	2	2	2	0	0	0
13	2	38	2	2	1	2	2	3	2	1	1	1	1	1	0	1	1	0	1	1	0	0	1	1	11	1	2	102	166	37.0155	4	110	1	0	0	1	0	0	0	1	0	0	0	1	2	2	0	0	0
14	2	40	2	2	2	9	3	6	1	3	1	1	1	1	1	0	1	1	1	1	0	0	1	1	14	1	0	79	164	29.3724	3	102	2	0	0	1	0	0	0	1	0	1	0	3	2	1	0	1	0
15	2	47	3	1	4	12	3	7	2	3	1	1	1	1	1	1	1	1	1	1	0	0	1	1	15	2	2	91	156	37.3932	4	90	2	0	1	1	1	1	1	1	1	1	0	3	2	1	0	1	0
16	2	56	4	2	1	0	1	6	1	3	2	2	1	1	0	0	0	1	1	1	0	0	0	1	13	1	2	70	153	29.903	3	75	4	0	0	1	1	0	0	1	0	0	0	2	3	2	0	0	0
17	2	60	5	2	1	0	1	6	1	4	3	1	1	1	1	0	1	1	1	1	0	0	1	1	17	2	5	60	156	24.6548	2	85	1	0	0	1	1	1	1	1	0	0	0	2	2	1	0	1	0
18	2	55	4	2	1	0	1	6	1	3	1	2	1	1	0	0	0	1	0	0	0	0	0	1	10	1	5	70	156	28.764	3	100	1	0	0	1	0	0	0	1	0	1	0	2	2	1	0	0	0
19	2	56	4	2	1	0	1	6	1	6	1	2	1	1	0	1	0	0	1	0	0	0	0	1	14	1	0	64	153	27.3399	3	85	4	0	0	1	0	0	1	1	0	1	0	3	1	1	0	1	0
20	2	54	4	1	1	0	1	5	2	1	1	1	1	0	1	1	1	1	1	0	0	0	1	1	11	1	4	75	148	34.2403	4	105	1	0	0	1	0	1	1	1	0	1	0	3	2	1	0	1	0
21	2	62	5	2	1	0	1	6	1	2	3	1	1	1	0	0	1	1	1	0	0	0	0	1	12	1	7	88	166	31.935	4	112	1	0	0	1	0	0	0	1	0	0	0	2	2	1	0	0	0
22	2	55	4	1	1	0	1	5	2	3	1	1	1	1	1	1	1	1	0	0	0	1	1	1	14	1	4	73	153	31.1846	4	102	1	0	0	1	0	1	1	1	0	1	0	3	2	1	0	1	0
23	2	55	4	2	1	0	1	6	1	2	2	2	1	1	0	0	0	1	1	1	0	0	1	1	13	1	2	70	148	31.9576	4	90	1	0	0	1	1	1	0	1	0	1	0	3	2	1	0	1	0
24	2	68	5	1	1	0	1	1	2	1	1	1	1	1	0	0	1	1	1	0	0	0	0	1	9	1	1	70	157	28.3987	3	93	1	0	0	1	0	0	0	1	0	0	1	2	2	4	0	1	0
25	2	58	4	1	1	0	1	5	2	2	2	2	1	1	0	1	1	1	1	0	0	0	0	1	13	1	1	80	155	33.2986	4	102	3	1	0	1	1	1	1	1	0	0	0	2	2	1	0	0	0
26	2	56	4	2	1	0	1	6	1	2	3	1	1	1	0	1	0	1	1	1	0	0	0	1	13	1	7	62	152	26.8352	3	89	1	0	0	1	1	1	1	1	0	0	0	3	2	1	0	1	0
27	2	33	1	1	1	0	1	2	2	2	1	1	1	1	0	1	1	1	1	0	0	0	0	1	11	1	7	67	150	29.7778	3	90	1	0	0	1	0	0	0	1	0	1	1	3	2	3	0	0	0
28	1	32	1	2	2	9	3	6	1	4	2	1	1	1	1	0	1	1	1	1	1	0	0	1	16	2	5	82	158	32.8473	4	97	1	0	0	1	0	1	1	1	0	1	1	1	3	2	0	0	1
29	1	63	5	2	1	0	1	6	1	5	5	1	1	1	1	0	1	1	1	0	1	0	1	1	20	2	0	92	159	36.391	4	102	4	0	0	1	1	1	1	1	0	0	0	1	2	1	0	1	0
30	1	45	3	1	1	4	2	4	2	1	1	1	1	1	1	1	0	1	1	1	1	0	1	1	13	1	0	82	158	32.8473	4	97	1	0	0	1	1	1	1	1	0	0	1	3	2	1	0	1	0
31	1	60	5	1	1	0	1	2	2	1	1	1	1	1	1	1	1	1	1	0	1	0	0	1	12	1	0	68	157	27.5873	3	80	3	0	0	1	1	0	0	1	0	0	1	3	2	1	0	0	0
32	1	48	3	1	1	0	1	4	2	2	1	1	1	1	1	0	1	1	1	1	0	0	1	1	13	1	0	87	169	30.4611	4	99	1	0	0	1	0	1	1	1	0	1	0	2	2	1	0	0	0
33	1	44	3	2	2	8	3	3	2	2	1	1	1	1	1	0	1	1	1	1	1	0	0	1	13	1	2	88	155	36.6285	4	113	1	0	1	1	0	1	0	1	0	0	1	2	2	1	0	0	0
34	1	20	1	1	1	0	1	2	2	2	2	2	1	1	1	0	1	1	1	0	0	0	0	1	13	1	4	72	157	29.2101	3	98	1	1	1	1	1	1	1	1	0	1	0	4	4	1	0	1	0
35	1	68	5	2	1	0	1	6	1	4	1	2	1	1	1	0	0	1	1	0	0	1	0	1	14	1	4	66	160	25.7812	3	105	3	0	0	1	1	1	1	1	0	1	0	1	2	1	0	0	0
36	1	40	2	2	1	0	1	6	1	5	2	1	1	1	1	0	1	1	1	1	1	0	1	1	18	2	2	80	175	26.1224	3	85	3	1	1	1	1	1	1	1	0	0	0	2	2	1	0	0	0
37	2	39	2	2	2	8	3	6	1	4	2	1	1	1	1	1	1	1	1	0	1	0	1	1	17	2	4	87	150	38.6667	4	111	1	0	0	1	1	1	0	1	0	1	1	4	1	1	0	1	0
38	2	65	5	1	1	0	1	5	2	3	2	1	1	1	0	1	1	1	1	1	0	0	0	1	14	1	4	95	172	32.112	4	118	2	0	0	1	1	1	1	1	0	0	0	2	1	1	0	1	1
39	2	60	5	2	1	0	1	6	1	3	2	2	1	1	0	0	0	1	1	0	0	0	0	1	12	1	2	83	155	34.5473	4	109	1	0	0	1	1	1	1	1	0	1	0	2	1	1	0	1	1
40	2	51	3	1	2	9	3	3	2	7	2	1	1	1	0	0	1	1	1	1	0	1	1	1	19	2	7	87	177	27.7698	3	104	2	0	0	1	0	1	0	1	0	0	0	3	1	1	1	0	0
41	2	48	3	2	1	4	2	6	1	6	3	1	1	1	1	0	1	1	1	0	1	0	1	1	19	2	0	80	156	32.8731	4	105	1	0	0	1	1	1	1	1	0	0	1	4	1	1	1	0	0
42	2	38	2	2	1	4	2	6	1	6	1	1	1	1	1	0	0	1	1	0	0	0	0	1	14	1	4	80	161	30.863	4	97	1	0	0	1	0	1	1	1	0	1	0	3	1	1	0	1	0
43	2	66	5	1	1	6	2	7	2	2	4	1	1	1	1	0	1	1	1	1	0	0	1	1	16	2	4	90.6	160	35.3906	4	116	2	0	0	1	0	0	1	1	0	1	0	1	1	1	0	0	0
44	2	52	3	2	1	5	2	6	1	5	1	2	1	1	1	0	1	1	1	1	0	0	1	1	17	2	4	77	154	32.4675	4	103	1	0	0	1	0	1	1	1	0	0	0	2	1	2	0	0	0
45	2	51	3	2	1	5	2	6	1	2	2	1	1	1	1	0	1	1	1	0	0	1	0	1	13	1	4	67	149	30.1788	4	96	1	0	0	1	1	1	1	1	0	0	0	3	1	1	1	1	1
46	2	70	5	2	1	0	1	7	2	3	2	2	1	1	0	0	1	1	0	1	0	0	0	1	13	1	4	73	145	34.7206	4	104	1	0	0	1	0	0	0	0	0	0	0	2	1	1	0	0	0
47	2	84	5	2	1	0	1	6	1	4	3	2	1	1	0	0	1	1	1	1	0	0	0	1	16	2	4	57	145	27.1106	3	98	4	1	0	1	0	0	0	0	0	1	1	3	4	1	0	0	0
48	2	53	3	2	1	0	1	6	1	4	3	2	1	1	1	1	0	1	0	0	0	0	0	1	15	2	1	89	157	36.1069	4	118	4	1	1	1	1	1	1	1	0	1	1	3	4	1	0	0	0
49	2	50	3	2	1	2	2	6	1	4	1	2	1	1	0	0	1	1	1	0	0	0	0	0	12	1	0	118.5	157	48.075	4	115	1	0	0	1	0	0	1	0	0	1	0	2	2	1	1	0	0
50	2	55	4	2	1	0	1	6	1	4	3	2	1	1	0	0	0	1	0	1	0	0	0	1	14	1	7	65.5	144	31.5876	4	85	1	0	0	1	1	1	0	0	0	1	0	3	1	1	0	1	0
51	2	55	4	2	1	0	1	6	1	3	2	2	1	1	1	0	1	1	1	0	1	0	1	1	16	2	1	60	151	26.3146	3	87	1	1	1	1	0	0	0	0	0	0	0	3	2	1	0	1	0
52	2	57	4	2	1	0	1	6	1	2	1	2	1	1	1	1	1	1	1	1	0	0	0	1	14	1	4	97	165	35.629	4	104	1	0	1	1	1	1	1	1	0	1	0	2	4	1	0	1	0
53	2	76	5	1	1	0	1	5	2	4	2	2	1	1	0	0	1	1	1	0	0	0	1	1	15	2	2	71	156	29.1749	3	104	2	0	1	1	0	0	0	0	0	1	0	2	1	1	0	1	0
54	2	64	5	2	1	0	1	6	1	1	7	1	1	1	0	1	1	1	1	0	0	0	0	1	16	2	1	80	146	37.5305	4	103	1	0	0	1	1	1	1	1	0	1	0	2	1	1	0	1	0
55	2	50	3	2	1	0	1	6	1	3	2	2	1	1	1	0	0	1	1	0	0	0	0	1	13	1	4	74	152	32.0291	4	91	1	0	1	1	0	0	0	0	0	0	1	3	2	1	0	0	0
56	2	50	3	2	1	0	1	6	1	1	3	1	1	1	0	0	0	1	1	0	0	0	0	1	10	1	4	62	149	27.9267	3	96	1	0	0	1	1	1	1	1	0	1	0	2	1	1	0	0	0
57	2	44	3	2	1	2	2	6	1	3	2	2	1	1	0	0	1	1	1	1	0	0	1	1	15	2	7	82	154	34.5758	4	104	1	0	1	1	1	1	1	1	0	1	0	3	1	1	0	0	0
58	2	65	5	2	1	0	1	6	1	5	3	2	1	1	1	0	0	0	1	1	1	0	0	1	17	2	1	63	144	30.3819	4	97	1	0	0	1	0	1	1	1	0	1	0	3	2	1	0	0	0
59	2	50	3	2	1	0	1	6	1	8	2	2	1	1	1	0	0	1	1	1	0	0	0	1	19	2	2	65	157	26.3702	3	96	4	0	0	1	1	1	1	1	0	0	1	3	2	1	1	1	0
60	2	65	5	2	1	0	1	6	1	12	3	1	1	2	0	0	1	1	1	0	0	0	0	1	23	2	4	62	154	26.1427	3	89	1	0	1	1	0	0	0	1	0	0	0	3	2	1	0	0	0
61	2	69	5	2	1	0	1	6	1	1	3	1	1	1	0	0	0	1	1	1	0	0	0	1	11	1	4	58	131	33.7976	4	89	1	0	0	1	0	0	0	0	0	0	1	2	1	1	0	1	0
62	2	48	3	2	1	0	1	6	1	8	2	2	1	1	0	0	1	1	1	0	0	0	1	1	19	2	1	61	145	29.0131	3	85	4	0	1	1	1	1	0	0	0	1	0	3	2	1	0	0	0
63	2	50	3	2	1	0	1	6	1	1	1	2	1	1	0	0	1	1	1	0	0	0	0	1	10	1	5	68	158	27.2392	3	92	1	0	1	1	1	0	0	0	0	1	0	3	2	1	0	0	0
64	2	50	3	1	2	8	3	5	2	4	2	1	1	1	1	1	0	1	1	1	1	0	0	1	16	2	7	81.5	172	27.5487	3	91	2	0	0	1	1	1	0	1	0	1	0	3	2	2	0	0	0
65	2	69	5	2	1	0	1	6	1	5	2	1	1	1	0	0	1	1	1	1	0	0	0	1	15	2	7	60	148	27.3923	3	102	4	0	1	1	1	1	0	1	0	1	0	1	1	1	0	1	0
66	2	56	4	1	1	0	1	7	2	5	3	1	1	1	1	1	1	1	#NULL!	1	1	0	0	1	19.2857	2	0	66.5	162	25.3391	3	92	2	0	0	1	1	1	1	1	0	0	1	4	2	1	0	0	0
67	2	50	3	1	1	3	2	7	2	4	2	2	1	1	0	0	1	1	1	1	0	0	0	1	15	2	4	85	165	31.2213	4	104	2	0	0	1	0	1	1	1	0	1	1	2	1	1	0	0	0
68	2	62	5	2	1	0	1	6	1	6	3	1	1	1	0	0	1	1	1	0	0	0	0	1	16	2	0	70	158	28.0404	3	102	4	0	0	1	0	0	0	0	0	0	1	4	1	1	0	1	0
69	2	55	4	2	1	0	1	6	1	5	3	1	1	1	1	0	1	1	1	1	0	0	0	1	17	2	4	76	151	33.3319	4	111	1	0	0	1	0	0	0	1	0	0	0	3	1	1	0	1	1
70	2	52	3	2	1	0	1	6	1	3	1	1	1	1	1	1	1	1	1	0	0	0	1	1	14	1	4	101	152	43.7154	4	130	4	0	0	1	1	1	1	1	0	1	1	5	2	1	0	1	0
71	2	45	3	2	2	8	3	7	2	3	2	2	1	1	0	0	1	1	1	2	0	0	1	1	16	2	4	85	170	29.4118	3	100	2	0	0	1	0	0	0	0	0	0	1	1	3	2	0	1	0
72	1	61	5	2	1	0	1	6	1	2	2	2	1	1	0	0	0	1	1	1	0	0	0	1	12	1	2	77	146	36.1231	4	96	1	0	0	1	0	1	1	1	0	0	1	2	2	2	0	1	0
73	1	67	5	1	1	0	1	7	2	3	2	2	1	1	0	0	0	1	1	1	0	0	0	1	13	1	2	66	157	26.7759	3	99	4	0	0	1	1	1	1	1	0	0	1	2	2	3	1	0	0
74	1	48	3	2	1	1	2	6	1	2	2	1	1	1	1	0	0	1	1	2	0	0	1	1	14	1	4	125	159	49.4442	4	123	1	0	0	1	0	0	0	0	0	0	0	2	1	3	0	0	0
75	1	45	3	2	1	3	2	6	1	4	2	2	1	1	1	1	0	1	1	1	0	0	1	1	17	2	4	80	162	30.4832	4	105	1	0	0	1	1	1	1	1	0	0	0	3	2	1	0	0	0
76	1	49	3	2	1	4	2	6	1	2	2	1	1	1	1	0	1	1	1	1	0	0	0	1	13	1	4	84	156	34.5168	4	118	1	0	0	1	1	0	0	1	0	0	0	3	1	1	0	1	0
77	1	68	5	1	1	2	2	5	2	2	1	1	1	1	1	0	0	1	1	1	0	0	0	1	11	1	4	73	160	28.5156	3	110	2	1	0	1	0	0	0	0	0	0	1	4	1	1	0	0	0
78	1	47	3	2	1	4	2	6	1	5	2	1	1	1	1	0	1	1	1	1	0	0	0	1	16	2	0	78	160	30.4687	4	110	1	0	0	1	1	1	1	1	0	1	0	2	2	1	0	0	1
79	1	70	5	2	1	0	1	6	1	1	1	2	0	1	0	0	0	0	0	0	0	0	0	1	6	1	4	56	147	25.9151	3	105	1	0	0	1	1	1	0	0	0	1	1	2	2	1	0	0	0
80	1	60	5	2	1	0	1	6	1	4	2	2	1	1	0	0	0	0	1	0	0	0	0	1	12	1	0	57	158	22.8329	2	90	1	0	0	1	1	1	1	1	0	1	1	4	2	1	0	1	0
81	1	73	5	2	1	0	1	6	1	1	2	2	1	1	0	0	0	1	1	0	0	0	0	1	10	1	7	45	150	20	2	85	1	0	0	1	1	1	1	1	0	1	0	2	2	1	0	0	0
82	1	51	3	2	1	0	1	6	1	4	1	1	1	1	1	0	0	1	1	1	0	0	0	1	13	1	2	80	161	30.863	4	93	1	0	1	1	1	1	1	1	0	0	0	2	2	1	0	1	0
83	1	50	3	1	1	5	2	7	2	5	1	1	1	1	1	0	0	1	1	1	0	0	1	1	15	2	4	82	170	28.3737	3	100	2	0	0	1	0	0	0	0	0	0	0	2	1	1	0	1	1
84	1	70	5	2	1	0	1	6	1	2	2	1	0	1	1	0	0	1	1	0	0	0	0	1	10	1	1	64	154	26.986	3	93	4	0	1	1	1	1	1	1	0	1	0	2	2	2	0	0	0
85	1	39	2	2	4	16	3	6	1	4	1	2	1	1	1	0	1	1	1	1	0	1	1	0	16	2	7	55	155	22.8928	2	82	1	1	1	1	1	1	1	1	0	1	0	3	2	3	0	1	0
86	1	56	4	1	1	0	1	4	2	2	2	1	1	1	1	0	1	1	1	1	1	0	1	1	15	2	4	99	172	33.464	4	100	2	0	1	1	1	1	1	1	0	0	0	2	2	3	0	0	0
87	1	50	3	2	1	0	1	6	1	2	2	1	1	1	1	0	1	1	1	1	0	0	0	1	13	1	4	70	163	26.3465	3	86	1	0	1	1	1	1	1	1	0	1	0	1	2	3	0	0	1
88	1	45	3	2	1	0	1	6	1	2	2	2	1	1	1	0	1	1	1	1	0	0	1	1	15	2	4	80	162	30.4832	4	118	1	1	1	1	1	0	1	1	0	1	0	2	1	1	0	0	0
89	1	40	2	2	1	5	2	6	1	2	2	1	1	1	1	1	1	1	0	1	0	0	1	1	14	1	0	85	160	33.2031	4	102	1	0	0	1	1	1	1	1	0	1	0	2	1	1	0	1	0
90	2	63	5	1	1	0	1	5	2	2	2	2	1	1	0	0	0	1	1	0	0	0	0	1	11	1	4	72	166	26.1286	3	104	4	0	1	0	0	0	0	1	0	0	1	#NULL!	9	9	0	0	0
91	2	68	5	1	1	0	1	5	2	5	1	2	1	1	0	0	0	0	1	0	0	0	0	1	12	1	4	70	160	27.3437	3	102	2	0	0	1	1	0	1	1	0	0	1	4	2	9	0	1	0
92	2	60	5	2	1	0	1	6	1	2	2	4	2	1	1	1	0	1	1	1	0	0	1	1	18	2	4	72	151	31.5776	4	99	4	0	1	1	1	1	1	1	0	1	0	1	2	1	0	1	0
93	2	63	5	2	1	0	1	6	1	3	2	1	1	2	0	0	1	1	1	3	0	1	0	3	19	2	7	73	159	28.8754	3	103	1	0	1	1	0	0	0	0	0	0	0	2	2	1	0	0	0
94	2	43	2	2	1	0	1	6	1	3	3	1	1	1	1	0	1	1	0	1	0	0	1	1	15	2	0	102	169	35.713	4	123	1	1	0	1	0	0	0	0	0	0	0	3	3	1	0	0	0
95	2	55	4	2	1	2	2	6	1	3	3	1	1	1	0	1	1	1	1	1	1	1	1	0	17	2	0	66	167	23.6652	2	100	1	0	0	1	0	0	0	0	0	1	0	2	2	1	0	1	0
96	2	50	3	2	1	0	1	6	1	6	2	1	1	1	1	1	1	1	1	1	0	0	1	1	19	2	4	80	158	32.0461	4	115	1	0	1	1	1	1	1	1	0	1	1	3	2	1	0	0	0
97	2	54	4	2	1	0	1	6	1	5	2	1	1	1	1	0	1	1	1	1	0	0	1	2	18	2	4	69	157	27.993	3	99	4	0	0	1	0	0	0	0	0	0	0	1	1	1	0	0	0
98	2	42	2	2	1	0	1	6	1	3	3	1	1	1	1	1	1	1	1	1	0	1	1	1	18	2	4	62	154	26.1427	3	80	1	0	0	1	1	1	1	1	1	1	0	2	2	3	1	1	0
99	2	44	3	2	1	5	2	6	1	3	2	2	1	1	1	0	1	1	1	1	0	0	0	1	15	2	4	94	161	36.264	4	113	1	0	0	1	1	1	1	1	1	1	0	3	2	1	0	0	0
100	2	37	2	2	1	2	2	6	1	9	5	1	2	2	2	0	1	1	1	1	1	0	1	1	28	2	4	87	164	32.3468	4	89	1	1	0	1	0	0	0	0	0	1	0	3	3	1	0	0	0
101	2	47	3	2	1	0	1	6	1	6	4	4	1	1	0	0	1	1	1	1	1	1	1	1	24	2	0	83	153	35.4564	4	108	1	1	1	0	1	0	0	0	0	1	1	2	2	1	0	0	0
102	2	45	3	2	1	0	1	6	1	4	2	1	1	1	0	0	1	1	1	1	0	0	0	1	14	1	0	100	162	38.1039	4	108	1	0	1	0	0	1	0	0	0	0	1	3	1	3	0	1	1
103	2	54	4	1	1	5	2	7	2	2	1	1	1	1	1	0	1	1	1	1	0	0	1	1	13	1	0	66.5	158	26.6384	3	98	1	0	1	1	0	1	0	0	0	1	1	2	3	1	0	0	1
104	2	45	3	2	1	0	1	6	1	3	3	1	1	1	0	0	1	1	1	1	1	0	1	1	16	2	0	71	156	29.1749	3	99	1	0	1	1	0	0	0	0	0	0	0	1	2	2	0	0	0
105	2	51	3	2	1	0	1	6	1	2	2	2	1	1	1	0	0	1	1	1	0	0	0	1	13	1	4	91	157	36.9183	4	108	1	0	0	1	0	0	0	0	0	1	0	1	2	2	1	1	0
106	2	43	2	2	1	2	2	2	2	2	2	1	1	1	0	0	1	1	1	0	0	0	1	7	18	2	7	82	150	36.4444	4	98	1	0	1	1	0	0	0	0	0	0	1	2	2	4	1	0	1
107	2	48	3	1	2	9	3	5	2	2	2	2	1	1	0	0	0	1	1	0	0	0	0	1	11	1	4	95	171	32.4886	4	105	4	0	1	1	0	0	0	0	0	0	1	3	9	9	1	1	1
108	2	74	5	1	1	0	1	5	2	5	1	2	1	1	0	0	0	0	1	0	0	0	0	1	12	1	4	80	179	24.968	2	98	2	0	0	1	1	1	1	1	1	0	1	4	2	9	0	1	0
109	2	52	3	1	1	0	1	6	1	2	2	1	1	1	1	0	1	1	1	1	0	0	0	1	13	1	4	88	150	39.1111	4	124	1	0	1	1	0	0	0	0	0	0	1	3	9	6	0	0	0
110	1	75	5	2	1	0	1	6	1	2	2	2	1	1	0	0	0	1	0	1	0	0	0	1	11	1	4	57	141	28.6706	3	97	1	0	0	1	0	0	0	0	0	1	0	3	9	9	0	0	0
111	1	66	5	1	1	0	1	5	2	2	2	1	1	1	0	1	1	1	1	0	0	0	1	1	13	1	7	85	161	32.7919	4	105	2	0	0	1	1	1	1	1	0	1	0	2	1	3	0	1	0
112	1	62	5	2	1	0	1	6	1	2	3	1	1	1	0	0	0	1	1	1	0	0	1	1	13	1	1	74	157	30.0215	4	100	1	0	0	1	0	0	0	0	0	0	1	3	1	2	0	0	0
113	1	67	5	2	1	0	1	6	1	2	2	2	1	1	0	0	0	0	1	1	0	0	0	1	11	1	4	75	157	30.4272	4	101	1	0	1	1	1	0	0	1	0	0	0	1	1	3	1	0	0
114	1	64	5	2	1	5	2	6	1	2	2	1	1	1	1	0	1	1	1	1	0	1	0	1	14	1	4	71	151	31.139	4	101	1	0	0	1	0	0	0	0	0	1	0	1	2	2	0	0	0
115	1	77	5	2	1	0	1	6	1	3	4	1	1	1	0	0	1	1	1	0	0	0	0	1	14	1	4	60	165	22.0386	2	96	3	0	1	1	1	1	1	1	0	0	0	1	3	1	0	0	0
116	1	77	5	2	1	0	1	6	1	2	2	2	1	1	1	0	1	1	1	1	0	0	0	1	14	1	4	54	141	27.1616	3	101	4	0	0	1	0	0	0	0	0	0	0	3	2	1	0	0	0
117	1	65	5	1	1	0	1	7	2	5	2	2	1	1	0	0	1	1	1	1	1	0	0	1	17	2	7	62	160	24.2187	2	95	2	0	0	1	1	0	1	1	0	1	0	2	1	9	0	1	0
118	1	55	4	2	1	3	2	6	1	3	3	1	1	1	1	0	1	1	1	1	0	0	1	1	16	2	7	68	159	26.8977	3	98	1	0	1	1	1	1	1	1	1	0	0	1	1	1	1	1	0
119	1	52	3	2	1	0	1	6	1	2	2	2	1	1	0	1	1	0	0	1	0	0	0	1	12	1	4	45	142	22.317	2	83	1	1	0	1	1	1	1	1	1	0	0	2	1	1	0	0	0
120	1	72	5	2	2	8	3	7	2	2	3	1	1	1	1	1	1	1	1	1	1	1	1	1	18	2	4	75	165	27.5482	3	101	1	0	0	1	1	1	1	1	1	0	0	1	3	2	0	0	0
121	1	65	5	1	1	5	2	7	2	2	2	1	1	1	1	1	1	1	1	1	1	1	1	1	17	2	4	60	156	24.6548	2	101	1	0	1	1	1	0	0	1	1	0	0	2	3	2	0	0	0
122	1	54	4	2	1	0	1	6	1	6	4	2	1	1	1	0	1	1	1	1	0	0	1	1	21	2	4	66	150	29.3333	3	89	3	0	1	1	1	1	1	1	0	1	0	2	1	1	0	1	0
123	1	59	4	2	1	2	2	6	1	2	2	2	1	1	0	0	0	1	1	0	0	0	0	1	11	1	4	67	157	27.1816	3	105	1	0	1	1	1	1	1	1	0	1	1	1	1	1	0	0	0
124	1	66	5	2	1	0	1	6	1	1	2	2	1	1	0	0	0	0	1	0	0	0	0	1	9	1	4	55	160	21.4844	2	95	1	0	1	1	1	1	1	1	0	1	1	2	2	1	0	0	0
125	1	74	5	2	1	0	1	6	1	4	2	1	1	1	0	0	0	0	1	0	0	0	0	1	11	1	4	57.5	146	26.975	3	90	3	0	1	1	1	1	1	1	0	1	1	2	1	1	0	0	0
126	1	53	3	2	1	2	2	6	1	3	2	1	1	0	0	0	0	1	1	1	0	0	0	1	11	1	1	77	152	33.3276	4	91	1	0	1	1	0	0	0	1	0	1	1	2	3	4	0	1	0
127	1	50	3	2	1	0	1	6	1	5	2	2	1	1	1	0	0	1	1	0	0	0	0	1	15	2	4	69	157	27.993	3	110	1	0	0	1	1	0	0	1	0	1	1	3	2	1	0	0	0
128	1	65	5	1	1	0	1	7	2	3	2	2	1	1	0	0	0	1	1	1	0	0	0	1	13	1	1	91	160	35.5469	4	101	2	0	1	1	1	1	1	1	0	0	1	3	1	1	0	0	0
129	1	47	3	2	1	4	2	6	1	3	3	1	1	1	1	0	0	1	1	1	1	0	1	1	16	2	4	119.5	156	49.1042	4	138	1	0	0	1	0	1	1	1	0	0	0	3	2	1	0	1	0
130	1	64	5	2	1	0	1	6	1	3	3	2	1	1	0	0	0	1	1	0	0	0	0	1	13	1	7	55	147	25.4524	3	102	1	0	0	1	1	1	1	1	0	1	0	1	2	1	0	0	0
131	1	56	4	2	1	0	1	6	1	2	2	1	1	1	1	0	1	1	1	0	0	0	0	1	12	1	4	64	144	30.8642	4	107	1	0	0	1	1	1	1	1	0	1	0	1	2	1	0	1	0
132	1	70	5	2	1	0	1	6	1	9	2	2	1	1	0	0	0	0	0	1	0	0	0	0	16	2	4	63	157	25.5588	3	101	3	1	0	1	0	0	0	0	0	1	0	3	2	1	0	0	0
133	1	42	2	2	1	4	2	6	1	5	2	1	1	1	1	0	1	1	1	1	0	0	1	1	17	2	4	119	165	43.7098	4	108	3	0	0	1	0	0	0	0	0	0	0	3	1	1	0	0	0
134	1	70	5	2	1	0	1	6	1	2	2	2	1	1	1	1	0	1	1	0	0	0	0	1	13	1	1	60	152	25.9695	3	86	1	0	0	1	0	0	0	0	0	1	1	4	2	1	0	0	1
135	1	46	3	2	1	0	1	6	1	5	2	1	1	1	1	0	1	1	1	0	1	0	1	1	17	2	1	65	151.5	28.3197	3	85	1	0	0	1	1	1	1	1	0	0	0	3	2	1	1	1	0
136	1	74	5	1	1	0	1	7	2	3	2	1	1	1	1	0	1	1	1	1	1	0	1	1	16	2	4	84	165	30.854	4	99	2	0	1	1	0	1	0	0	0	0	0	1	2	2	1	1	0
137	1	45	3	2	1	5	2	6	1	4	2	2	1	1	0	0	0	1	1	1	0	0	0	1	14	1	0	86	156	35.3386	4	97	1	0	1	1	0	0	0	0	0	0	1	3	9	9	0	0	0
138	1	41	2	2	1	5	2	6	1	4	2	1	1	1	0	0	1	1	1	0	1	0	0	1	14	1	0	56	153	23.9224	2	73	1	0	0	1	0	0	0	0	0	0	0	2	9	9	0	1	0
139	1	45	3	1	1	0	1	4	2	4	3	2	1	1	1	0	0	1	1	1	0	0	0	0	15	2	5	87	167	31.1951	4	107	2	1	0	1	1	1	0	1	0	1	1	3	2	1	0	1	0
140	1	60	5	2	1	0	1	6	1	3	3	1	1	1	0	1	1	1	1	0	0	0	1	1	15	2	2	69.7	149	31.395	4	100	1	0	0	1	0	0	0	0	0	0	0	3	2	1	0	1	0
141	1	44	3	2	1	5	2	6	1	4	2	1	1	1	1	0	1	1	1	1	1	0	1	1	17	2	0	82	158	32.8473	4	106	1	0	0	1	0	0	0	0	0	0	0	1	9	9	0	1	0
142	1	54	4	2	1	4	2	6	1	3	2	2	1	1	1	0	0	1	1	1	1	0	1	1	16	2	1	94.5	110	78.0992	4	104	1	0	0	1	1	1	1	1	0	0	0	3	4	2	0	1	0
143	1	56	4	2	1	5	2	6	1	5	2	1	1	1	1	0	1	1	1	0	0	0	0	0	14	1	4	73	158	29.2421	3	101	1	0	1	1	0	1	1	1	0	1	0	3	1	1	0	0	0
144	1	54	4	2	1	5	2	6	1	6	2	1	1	0	1	0	1	1	1	0	0	0	0	0	14	1	4	60	154	25.2994	3	99	1	0	1	1	0	1	1	1	0	0	0	3	1	2	0	0	0
145	1	59	4	2	1	0	1	6	1	2	2	1	1	1	1	1	1	1	1	1	0	0	1	1	15	2	1	79	150	35.1111	4	115	1	0	1	1	1	1	0	0	0	0	0	2	1	1	0	0	0
146	1	50	3	2	1	0	1	6	1	3	2	2	1	1	1	0	1	1	1	1	0	0	0	0	14	1	4	84	156	34.5168	4	101	1	0	0	1	0	0	0	0	0	1	1	3	2	1	0	0	0
147	1	74	5	2	1	0	1	6	1	2	3	2	1	1	1	0	0	1	1	1	0	0	0	0	13	1	4	72	155	29.9688	3	99	1	0	0	1	1	0	0	1	0	1	0	3	2	1	0	1	0
148	1	42	2	2	2	8	3	6	1	4	2	1	1	1	1	0	1	1	1	1	1	0	1	1	17	2	0	71	153	30.3302	4	96	1	0	1	1	1	1	1	1	1	1	0	2	2	2	0	0	0
149	1	32	1	2	2	9	3	6	1	4	2	2	1	1	1	0	1	1	1	0	0	0	0	0	14	1	0	62	167	22.231	2	99	1	0	0	1	1	1	1	1	1	1	0	3	2	1	0	0	0
150	1	42	2	2	3	12	3	1	2	3	2	1	1	1	0	0	0	1	1	0	0	0	0	1	11	1	4	73	152	31.5963	4	107	1	0	1	1	1	1	1	1	1	1	0	3	2	1	0	0	0
151	1	67	5	2	1	0	1	6	1	2	2	1	1	1	0	0	0	1	1	1	0	0	0	0	10	1	4	59	146	27.6787	3	91	1	0	0	1	1	1	1	1	1	1	0	2	2	1	0	0	0
152	1	62	5	2	1	0	1	6	1	2	2	1	1	1	1	0	1	1	1	0	0	0	1	1	13	1	4	65	153	27.7671	3	102	1	0	1	1	0	0	0	1	0	1	0	1	1	1	0	0	0
153	1	48	3	2	1	5	2	6	1	3	2	1	1	0	1	0	1	1	1	1	1	0	0	0	13	1	4	73	154	30.7809	4	101	1	0	1	0	0	0	0	1	0	0	0	3	2	2	0	0	0
154	1	54	4	2	1	5	2	6	1	3	2	1	1	1	1	1	1	1	1	1	0	0	0	1	15	2	4	80	158	32.0461	4	112	3	0	1	1	1	1	1	1	0	1	0	2	2	2	0	1	0
155	1	57	4	2	1	3	2	6	1	3	3	2	1	1	1	0	1	1	1	1	0	0	0	1	16	2	4	74	152	32.0291	4	97	1	0	1	1	1	1	0	0	0	0	0	2	1	1	0	1	0
156	1	47	3	2	1	4	2	6	1	3	3	2	1	1	1	0	1	1	1	1	0	0	1	1	17	2	1	101	114	77.7162	4	108	1	0	0	1	1	1	0	1	0	1	0	3	2	2	0	1	0
157	1	66	5	2	1	3	2	6	1	1	2	2	1	1	1	0	1	1	1	1	0	0	0	1	13	1	2	73.5	151	32.2354	4	105	1	0	0	1	0	1	1	1	0	1	0	3	2	2	0	1	0
158	1	66	5	2	1	0	1	6	1	3	2	2	1	1	1	0	1	1	1	1	0	0	0	1	15	2	1	91	146	42.6909	4	111	1	0	0	1	0	0	1	1	0	1	1	3	3	2	0	1	0
159	1	60	5	2	1	0	1	6	1	3	2	1	1	1	1	0	1	1	1	0	0	0	0	1	13	1	1	62	156	25.4767	3	105	1	0	0	1	0	0	0	0	0	1	0	2	9	9	0	1	0
160	1	41	2	2	1	0	1	6	1	6	2	2	1	1	1	0	1	1	1	1	0	0	1	1	19	2	4	88	156	36.1604	4	101	3	0	0	1	1	1	1	1	0	1	1	3	1	1	0	1	0
161	1	36	2	2	1	5	2	6	1	5	1	2	1	1	0	0	1	0	1	1	1	0	0	1	15	2	4	138	158	55.2796	4	130	1	0	0	1	0	1	1	1	0	1	1	3	2	1	0	1	0
162	1	72	5	1	1	0	1	7	2	6	1	1	1	1	1	1	1	1	1	1	1	1	1	4	23	2	4	78	170	26.9896	3	109	3	0	0	1	0	1	0	0	0	0	0	1	1	1	0	1	0
163	1	72	5	1	1	0	1	4	2	10	4	2	1	1	0	0	1	0	1	0	0	0	1	1	22	2	0	64	165	23.5078	2	102	2	0	0	1	1	1	1	1	0	1	1	2	1	1	0	1	0
164	1	17	1	2	1	5	2	6	1	6	1	1	1	1	0	0	1	1	1	0	0	0	1	1	15	2	1	94	159	37.1821	4	93	3	0	0	1	1	1	1	1	0	1	1	2	2	1	0	1	0
165	1	81	5	1	1	0	1	4	2	5	2	1	1	1	0	0	1	1	1	0	0	0	1	1	15	2	1	59	161	22.7615	2	93	3	0	0	1	0	0	0	0	0	0	0	1	9	9	0	1	0
166	1	70	5	1	1	0	1	4	2	3	2	1	1	1	0	0	1	1	0	1	0	0	1	1	13	1	1	59	161	22.7615	2	93	2	0	0	1	0	0	0	0	0	0	0	1	2	3	0	1	0
167	1	50	3	1	1	0	1	6	1	3	1	2	1	1	0	0	1	0	1	1	0	0	0	1	12	1	4	66	161	25.462	3	97	1	0	0	1	0	1	0	0	0	1	1	3	1	1	0	1	0
168	1	16	1	2	2	9	3	6	1	8	5	2	1	1	1	1	1	1	1	1	1	0	1	1	26	2	6	66	158	26.4381	3	76	3	0	0	1	0	0	0	0	0	1	1	3	1	1	0	1	0
169	1	49	3	2	1	5	2	6	1	3	2	2	1	1	0	0	1	0	1	1	0	0	0	1	13	1	1	59	149	26.5754	3	90	1	0	0	1	0	1	1	1	0	0	0	2	2	1	1	1	1
170	1	57	4	1	1	0	1	6	1	13	12	1	1	1	1	0	1	1	1	1	1	0	1	1	36	2	0	85	172	28.7317	3	104	2	0	0	1	1	1	1	1	0	1	0	3	2	2	0	0	0
171	1	47	3	2	1	0	1	6	1	5	5	2	1	1	1	1	1	0	1	0	1	0	1	1	21	2	4	82	153	35.0293	4	102	3	0	0	1	1	0	1	1	0	1	1	3	2	1	0	0	0
172	1	65	5	1	1	5	2	7	2	6	5	1	1	1	1	0	1	1	1	1	0	0	1	1	21	2	0	84	166	30.4834	4	106	3	0	0	1	0	0	0	1	0	0	0	3	3	2	0	0	0
173	1	67	5	1	1	0	2	5	2	2	1	2	1	1	0	0	1	1	1	1	0	0	0	1	12	1	1	59	162	22.4813	2	94	2	0	0	1	0	0	0	0	0	0	0	3	2	2	1	1	1
174	1	58	4	1	1	5	2	4	2	4	3	1	1	1	0	0	1	1	1	1	0	0	0	1	15	2	1	110	170	38.0623	4	120	3	1	1	1	0	0	1	1	0	0	0	2	2	2	0	0	0
175	1	52	3	1	1	5	2	3	2	2	2	1	1	1	0	0	1	1	1	1	0	0	1	1	13	1	0	96	159	37.9732	4	120	2	1	0	1	1	0	0	0	0	1	1	1	2	2	0	0	0
176	2	38	2	1	1	9	3	7	2	5	3	1	3	1	1	1	1	1	2	1	1	0	1	1	23	2	7	132	179	41.1972	4	135	3	1	0	1	0	1	0	1	0	0	1	3	3	4	0	1	0
177	2	46	3	1	1	9	3	7	2	3	3	2	1	1	1	0	1	1	1	1	0	0	1	1	17	2	0	99	179	30.8979	4	124	2	1	1	1	0	0	0	1	0	1	1	2	1	3	1	1	0
178	2	33	1	1	1	4	2	4	2	4	3	2	1	2	1	0	1	1	0	1	0	0	0	1	17	2	7	102	176	32.9287	4	116	3	1	0	1	0	1	0	0	0	1	1	1	1	2	0	1	0
179	2	84	5	1	1	0	1	7	2	4	2	2	1	1	0	0	1	1	1	0	1	0	0	0	14	1	1	76	160	29.6875	3	109	2	1	0	1	0	1	0	1	0	0	1	3	2	2	0	0	0
180	2	68	5	1	1	5	2	5	2	2	3	1	1	1	1	0	0	0	1	1	0	0	1	0	12	1	1	76	176	24.5351	2	97	2	1	0	1	0	0	0	1	0	1	1	1	1	2	1	0	0
181	2	77	5	1	1	0	1	5	2	2	2	2	1	1	1	0	0	1	1	0	0	0	0	1	12	1	0	85	157	34.4842	4	111	2	1	0	1	0	0	0	0	0	0	0	1	1	1	0	0	0
182	2	70	5	1	1	0	1	7	1	3	4	1	1	1	0	0	1	1	1	0	0	0	0	0	13	1	0	54	160	21.0937	2	87	2	1	0	1	0	0	0	1	0	0	1	1	1	2	1	0	0
183	2	84	5	1	1	2	1	5	2	2	2	2	1	1	0	0	0	0	0	0	0	0	0	0	8	1	1	63.2	163	23.7871	2	98	2	1	0	1	0	1	0	0	0	0	1	1	1	2	0	0	0
184	2	81	5	1	1	0	1	5	2	2	3	2	1	1	0	0	0	1	1	0	0	0	0	0	11	1	1	58	166	21.048	2	105	2	0	0	1	1	1	0	1	0	0	1	1	1	2	0	0	0
185	1	54	4	1	1	1	0	7	2	3	2	2	1	1	0	0	0	0	0	0	0	0	0	1	10	1	0	79	155	32.8824	4	88	1	0	1	1	0	0	1	0	0	1	1	3	3	3	0	0	0
186	1	49	3	1	1	5	2	4	2	4	2	1	1	1	1	0	0	1	1	1	0	0	0	1	14	1	0	105	176	33.8972	4	120	2	0	1	1	0	0	0	0	0	1	0	3	2	3	0	1	0
187	1	61	5	1	1	5	2	4	2	4	2	2	1	1	1	0	1	1	1	1	0	0	1	1	17	2	0	83	164	30.8596	4	96	2	1	1	1	0	1	0	0	0	0	1	3	1	2	0	0	0
188	1	58	4	1	1	5	2	4	2	4	4	1	1	1	1	0	1	1	1	1	0	0	0	1	17	2	1	80	171	27.3588	3	93	1	0	1	0	1	0	1	0	0	1	0	1	3	0	0	0	0
189	2	50	3	1	1	9	3	7	2	6	3	1	3	1	0	0	1	2	1	3	0	0	1	3	25	2	1	82	174	27.0842	3	102	2	1	0	1	1	1	0	0	1	0	1	1	2	3	0	0	1
190	2	54	4	1	1	3	2	4	2	7	6	1	2	2	0	0	2	2	1	1	0	0	1	1	26	2	1	77	162	29.34	3	112	3	1	0	1	0	1	0	0	0	1	1	2	2	2	0	0	0
191	2	59	4	1	1	5	2	7	2	6	3	1	2	2	1	0	1	2	1	1	1	0	1	3	25	2	1	80	169	28.0102	3	98	1	0	0	1	0	1	0	0	1	1	1	3	3	3	0	1	1
192	2	64	5	1	1	5	2	4	2	5	5	1	2	2	1	0	1	1	1	1	0	0	0	1	21	2	1	74	165	27.1809	3	89	2	1	0	1	0	1	0	0	0	1	1	1	2	2	1	1	0
193	2	76	5	1	1	5	2	5	2	4	3	2	1	1	1	0	1	1	1	1	0	0	0	1	17	2	5	73	171	24.9649	2	92	2	0	0	1	1	1	1	1	1	1	1	3	3	3	1	1	0
194	2	65	5	1	1	5	2	7	2	7	2	2	1	1	1	0	1	1	1	1	0	0	0	0	18	2	4	70	173	23.3887	2	84	1	0	0	1	1	1	1	1	1	0	1	2	2	2	0	1	1
195	2	81	5	1	1	5	2	7	2	2	3	2	1	1	1	0	0	1	1	1	0	0	0	1	14	1	4	63	172	21.2953	2	88	1	0	1	1	1	1	1	1	1	1	1	1	2	2	0	0	0
196	2	76	5	1	1	0	1	5	2	2	2	2	1	1	1	0	0	1	1	0	0	0	0	1	12	1	4	71	159	28.0843	3	83	1	0	0	1	1	1	1	1	1	1	1	2	2	2	0	0	0
197	2	69	5	1	1	0	1	4	2	5	2	1	1	1	1	0	1	1	1	1	0	0	0	1	16	2	4	85	175	27.7551	3	88	1	1	1	1	0	0	0	0	0	1	1	1	2	2	0	0	0
198	1	70	5	1	1	5	2	7	1	2	1	1	1	1	0	0	0	1	0	1	0	0	0	1	9	1	1	81	174	26.7539	3	100	2	0	0	1	0	0	0	0	0	0	0	4	4	2	0	0	0
199	1	70	5	1	1	0	1	4	2	2	3	2	1	1	0	0	1	1	1	1	0	0	0	1	14	1	1	97	166	35.201	4	110	2	1	0	1	0	0	1	1	1	1	1	1	1	2	0	1	0
200	1	79	5	1	1	0	1	7	1	2	3	1	1	1	0	0	1	1	1	1	0	0	0	1	13	1	1	77	159	30.4577	4	110	2	1	1	1	1	0	0	1	0	1	1	1	3	4	1	1	0
201	1	75	5	1	1	0	1	5	2	2	2	1	1	1	0	0	1	1	1	0	0	0	0	1	11	1	1	70	177	22.3435	2	90	2	0	1	1	1	1	1	1	1	0	0	3	1	2	0	1	0
202	1	84	5	1	1	5	2	5	2	3	2	1	1	1	1	1	1	1	1	0	0	0	0	2	15	2	0	68	154	28.6726	3	101	2	0	0	1	1	1	1	1	1	1	1	0	1	1	2	0	0
203	1	72	5	1	1	5	2	4	2	1	2	2	1	1	0	0	0	0	1	1	0	0	0	0	9	1	1	71	162	27.0538	3	98	3	1	1	1	1	1	1	1	1	1	1	1	1	2	0	0	0
204	1	88	5	1	1	0	1	5	2	1	2	1	1	1	0	0	0	0	0	0	0	0	0	1	7	1	1	60	154	25.2994	3	91	3	0	0	1	1	1	1	1	1	1	1	1	2	1	0	0	0
205	1	60	5	1	1	5	2	7	2	4	2	1	1	1	1	0	1	1	1	1	0	0	1	1	16	2	1	84.8	170	29.3426	3	102	2	1	0	1	1	1	1	1	1	1	0	1	1	0	0	0	0
#NULL!	#NULL!	#NULL!	#NULL!	#NULL!	#NULL!	#NULL!	#NULL!	#NULL!	#NULL!	#NULL!	#NULL!	#NULL!	#NULL!	#NULL!	#NULL!	#NULL!	#NULL!	#NULL!	#NULL!	#NULL!	#NULL!	#NULL!	#NULL!	#NULL!	#NULL!	#NULL!	#NULL!	#NULL!	#NULL!	#NULL!	#NULL!	#NULL!	#NULL!	#NULL!	#NULL!	#NULL!	#NULL!	#NULL!	#NULL!	#NULL!	#NULL!	#NULL!	#NULL!	#NULL!	#NULL!	#NULL!	#NULL!	#NULL!	#NULL!
#NULL!	#NULL!	#NULL!	#NULL!	#NULL!	#NULL!	#NULL!	#NULL!	#NULL!	#NULL!	#NULL!	#NULL!	#NULL!	#NULL!	#NULL!	#NULL!	#NULL!	#NULL!	#NULL!	#NULL!	#NULL!	#NULL!	#NULL!	#NULL!	#NULL!	#NULL!	#NULL!	#NULL!	#NULL!	#NULL!	#NULL!	#NULL!	#NULL!	#NULL!	#NULL!	#NULL!	#NULL!	#NULL!	#NULL!	#NULL!	#NULL!	#NULL!	#NULL!	#NULL!	#NULL!	#NULL!	#NULL!	#NULL!	#NULL!	#NULL!
#NULL!	#NULL!	#NULL!	#NULL!	#NULL!	#NULL!	#NULL!	#NULL!	#NULL!	#NULL!	#NULL!	#NULL!	#NULL!	#NULL!	#NULL!	#NULL!	#NULL!	#NULL!	#NULL!	#NULL!	#NULL!	#NULL!	#NULL!	#NULL!	#NULL!	#NULL!	#NULL!	#NULL!	#NULL!	#NULL!	#NULL!	#NULL!	#NULL!	#NULL!	#NULL!	#NULL!	#NULL!	#NULL!	#NULL!	#NULL!	#NULL!	#NULL!	#NULL!	#NULL!	#NULL!	#NULL!	#NULL!	#NULL!	#NULL!	#NULL!
#NULL!	#NULL!	#NULL!	#NULL!	#NULL!	#NULL!	#NULL!	#NULL!	#NULL!	#NULL!	#NULL!	#NULL!	#NULL!	#NULL!	#NULL!	#NULL!	#NULL!	#NULL!	#NULL!	#NULL!	#NULL!	#NULL!	#NULL!	#NULL!	#NULL!	#NULL!	#NULL!	#NULL!	#NULL!	#NULL!	#NULL!	#NULL!	#NULL!	#NULL!	#NULL!	#NULL!	#NULL!	#NULL!	#NULL!	#NULL!	#NULL!	#NULL!	#NULL!	#NULL!	#NULL!	#NULL!	#NULL!	#NULL!	#NULL!	#NULL!
#NULL!	#NULL!	#NULL!	#NULL!	#NULL!	#NULL!	#NULL!	#NULL!	#NULL!	#NULL!	#NULL!	#NULL!	#NULL!	#NULL!	#NULL!	#NULL!	#NULL!	#NULL!	#NULL!	#NULL!	#NULL!	#NULL!	#NULL!	#NULL!	#NULL!	#NULL!	#NULL!	#NULL!	#NULL!	#NULL!	#NULL!	#NULL!	#NULL!	#NULL!	#NULL!	#NULL!	#NULL!	#NULL!	#NULL!	#NULL!	#NULL!	#NULL!	#NULL!	#NULL!	#NULL!	#NULL!	#NULL!	#NULL!	#NULL!	#NULL!
#NULL!	#NULL!	#NULL!	#NULL!	#NULL!	#NULL!	#NULL!	#NULL!	#NULL!	#NULL!	#NULL!	#NULL!	#NULL!	#NULL!	#NULL!	#NULL!	#NULL!	#NULL!	#NULL!	#NULL!	#NULL!	#NULL!	#NULL!	#NULL!	#NULL!	#NULL!	#NULL!	#NULL!	#NULL!	#NULL!	#NULL!	#NULL!	#NULL!	#NULL!	#NULL!	#NULL!	#NULL!	#NULL!	#NULL!	#NULL!	#NULL!	#NULL!	#NULL!	#NULL!	#NULL!	#NULL!	#NULL!	#NULL!	#NULL!	#NULL!
#NULL!	#NULL!	#NULL!	#NULL!	#NULL!	#NULL!	#NULL!	#NULL!	#NULL!	#NULL!	#NULL!	#NULL!	#NULL!	#NULL!	#NULL!	#NULL!	#NULL!	#NULL!	#NULL!	#NULL!	#NULL!	#NULL!	#NULL!	#NULL!	#NULL!	#NULL!	#NULL!	#NULL!	#NULL!	#NULL!	#NULL!	#NULL!	#NULL!	#NULL!	#NULL!	#NULL!	#NULL!	#NULL!	#NULL!	#NULL!	#NULL!	#NULL!	#NULL!	#NULL!	#NULL!	#NULL!	#NULL!	#NULL!	#NULL!	#NULL!
#NULL!	#NULL!	#NULL!	#NULL!	#NULL!	#NULL!	#NULL!	#NULL!	#NULL!	#NULL!	#NULL!	#NULL!	#NULL!	#NULL!	#NULL!	#NULL!	#NULL!	#NULL!	#NULL!	#NULL!	#NULL!	#NULL!	#NULL!	#NULL!	#NULL!	#NULL!	#NULL!	#NULL!	#NULL!	#NULL!	#NULL!	#NULL!	#NULL!	#NULL!	#NULL!	#NULL!	#NULL!	#NULL!	#NULL!	#NULL!	#NULL!	#NULL!	#NULL!	#NULL!	#NULL!	#NULL!	#NULL!	#NULL!	#NULL!	#NULL!
#NULL!	#NULL!	#NULL!	#NULL!	#NULL!	#NULL!	#NULL!	#NULL!	#NULL!	#NULL!	#NULL!	#NULL!	#NULL!	#NULL!	#NULL!	#NULL!	#NULL!	#NULL!	#NULL!	#NULL!	#NULL!	#NULL!	#NULL!	#NULL!	#NULL!	#NULL!	#NULL!	#NULL!	#NULL!	#NULL!	#NULL!	#NULL!	#NULL!	#NULL!	#NULL!	#NULL!	#NULL!	#NULL!	#NULL!	#NULL!	#NULL!	#NULL!	#NULL!	#NULL!	#NULL!	#NULL!	#NULL!	#NULL!	#NULL!	#NULL!
#NULL!	#NULL!	#NULL!	#NULL!	#NULL!	#NULL!	#NULL!	#NULL!	#NULL!	#NULL!	#NULL!	#NULL!	#NULL!	#NULL!	#NULL!	#NULL!	#NULL!	#NULL!	#NULL!	#NULL!	#NULL!	#NULL!	#NULL!	#NULL!	#NULL!	#NULL!	#NULL!	#NULL!	#NULL!	#NULL!	#NULL!	#NULL!	#NULL!	#NULL!	#NULL!	#NULL!	#NULL!	#NULL!	#NULL!	#NULL!	#NULL!	#NULL!	#NULL!	#NULL!	#NULL!	#NULL!	#NULL!	#NULL!	#NULL!	#NULL!
#NULL!	#NULL!	#NULL!	#NULL!	#NULL!	#NULL!	#NULL!	#NULL!	#NULL!	#NULL!	#NULL!	#NULL!	#NULL!	#NULL!	#NULL!	#NULL!	#NULL!	#NULL!	#NULL!	#NULL!	#NULL!	#NULL!	#NULL!	#NULL!	#NULL!	#NULL!	#NULL!	#NULL!	#NULL!	#NULL!	#NULL!	#NULL!	#NULL!	#NULL!	#NULL!	#NULL!	#NULL!	#NULL!	#NULL!	#NULL!	#NULL!	#NULL!	#NULL!	#NULL!	#NULL!	#NULL!	#NULL!	#NULL!	#NULL!	#NULL!
#NULL!	#NULL!	#NULL!	#NULL!	#NULL!	#NULL!	#NULL!	#NULL!	#NULL!	#NULL!	#NULL!	#NULL!	#NULL!	#NULL!	#NULL!	#NULL!	#NULL!	#NULL!	#NULL!	#NULL!	#NULL!	#NULL!	#NULL!	#NULL!	#NULL!	#NULL!	#NULL!	#NULL!	#NULL!	#NULL!	#NULL!	#NULL!	#NULL!	#NULL!	#NULL!	#NULL!	#NULL!	#NULL!	#NULL!	#NULL!	#NULL!	#NULL!	#NULL!	#NULL!	#NULL!	#NULL!	#NULL!	#NULL!	#NULL!	#NULL!
#NULL!	#NULL!	#NULL!	#NULL!	#NULL!	#NULL!	#NULL!	#NULL!	#NULL!	#NULL!	#NULL!	#NULL!	#NULL!	#NULL!	#NULL!	#NULL!	#NULL!	#NULL!	#NULL!	#NULL!	#NULL!	#NULL!	#NULL!	#NULL!	#NULL!	#NULL!	#NULL!	#NULL!	#NULL!	#NULL!	#NULL!	#NULL!	#NULL!	#NULL!	#NULL!	#NULL!	#NULL!	#NULL!	#NULL!	#NULL!	#NULL!	#NULL!	#NULL!	#NULL!	#NULL!	#NULL!	#NULL!	#NULL!	#NULL!	#NULL!
#NULL!	#NULL!	#NULL!	#NULL!	#NULL!	#NULL!	#NULL!	#NULL!	#NULL!	#NULL!	#NULL!	#NULL!	#NULL!	#NULL!	#NULL!	#NULL!	#NULL!	#NULL!	#NULL!	#NULL!	#NULL!	#NULL!	#NULL!	#NULL!	#NULL!	#NULL!	#NULL!	#NULL!	#NULL!	#NULL!	#NULL!	#NULL!	#NULL!	#NULL!	#NULL!	#NULL!	#NULL!	#NULL!	#NULL!	#NULL!	#NULL!	#NULL!	#NULL!	#NULL!	#NULL!	#NULL!	#NULL!	#NULL!	#NULL!	#NULL!
#NULL!	#NULL!	#NULL!	#NULL!	#NULL!	#NULL!	#NULL!	#NULL!	#NULL!	#NULL!	#NULL!	#NULL!	#NULL!	#NULL!	#NULL!	#NULL!	#NULL!	#NULL!	#NULL!	#NULL!	#NULL!	#NULL!	#NULL!	#NULL!	#NULL!	#NULL!	#NULL!	#NULL!	#NULL!	#NULL!	#NULL!	#NULL!	#NULL!	#NULL!	#NULL!	#NULL!	#NULL!	#NULL!	#NULL!	#NULL!	#NULL!	#NULL!	#NULL!	#NULL!	#NULL!	#NULL!	#NULL!	#NULL!	#NULL!	#NULL!
#NULL!	#NULL!	#NULL!	#NULL!	#NULL!	#NULL!	#NULL!	#NULL!	#NULL!	#NULL!	#NULL!	#NULL!	#NULL!	#NULL!	#NULL!	#NULL!	#NULL!	#NULL!	#NULL!	#NULL!	#NULL!	#NULL!	#NULL!	#NULL!	#NULL!	#NULL!	#NULL!	#NULL!	#NULL!	#NULL!	#NULL!	#NULL!	#NULL!	#NULL!	#NULL!	#NULL!	#NULL!	#NULL!	#NULL!	#NULL!	#NULL!	#NULL!	#NULL!	#NULL!	#NULL!	#NULL!	#NULL!	#NULL!	#NULL!	#NULL!
#NULL!	#NULL!	#NULL!	#NULL!	#NULL!	#NULL!	#NULL!	#NULL!	#NULL!	#NULL!	#NULL!	#NULL!	#NULL!	#NULL!	#NULL!	#NULL!	#NULL!	#NULL!	#NULL!	#NULL!	#NULL!	#NULL!	#NULL!	#NULL!	#NULL!	#NULL!	#NULL!	#NULL!	#NULL!	#NULL!	#NULL!	#NULL!	#NULL!	#NULL!	#NULL!	#NULL!	#NULL!	#NULL!	#NULL!	#NULL!	#NULL!	#NULL!	#NULL!	#NULL!	#NULL!	#NULL!	#NULL!	#NULL!	#NULL!	#NULL!
#NULL!	#NULL!	#NULL!	#NULL!	#NULL!	#NULL!	#NULL!	#NULL!	#NULL!	#NULL!	#NULL!	#NULL!	#NULL!	#NULL!	#NULL!	#NULL!	#NULL!	#NULL!	#NULL!	#NULL!	#NULL!	#NULL!	#NULL!	#NULL!	#NULL!	#NULL!	#NULL!	#NULL!	#NULL!	#NULL!	#NULL!	#NULL!	#NULL!	#NULL!	#NULL!	#NULL!	#NULL!	#NULL!	#NULL!	#NULL!	#NULL!	#NULL!	#NULL!	#NULL!	#NULL!	#NULL!	#NULL!	#NULL!	#NULL!	#NULL!
#NULL!	#NULL!	#NULL!	#NULL!	#NULL!	#NULL!	#NULL!	#NULL!	#NULL!	#NULL!	#NULL!	#NULL!	#NULL!	#NULL!	#NULL!	#NULL!	#NULL!	#NULL!	#NULL!	#NULL!	#NULL!	#NULL!	#NULL!	#NULL!	#NULL!	#NULL!	#NULL!	#NULL!	#NULL!	#NULL!	#NULL!	#NULL!	#NULL!	#NULL!	#NULL!	#NULL!	#NULL!	#NULL!	#NULL!	#NULL!	#NULL!	#NULL!	#NULL!	#NULL!	#NULL!	#NULL!	#NULL!	#NULL!	#NULL!	#NULL!
#NULL!	#NULL!	#NULL!	#NULL!	#NULL!	#NULL!	#NULL!	#NULL!	#NULL!	#NULL!	#NULL!	#NULL!	#NULL!	#NULL!	#NULL!	#NULL!	#NULL!	#NULL!	#NULL!	#NULL!	#NULL!	#NULL!	#NULL!	#NULL!	#NULL!	#NULL!	#NULL!	#NULL!	#NULL!	#NULL!	#NULL!	#NULL!	#NULL!	#NULL!	#NULL!	#NULL!	#NULL!	#NULL!	#NULL!	#NULL!	#NULL!	#NULL!	#NULL!	#NULL!	#NULL!	#NULL!	#NULL!	#NULL!	#NULL!	#NULL!
#NULL!	#NULL!	#NULL!	#NULL!	#NULL!	#NULL!	#NULL!	#NULL!	#NULL!	#NULL!	#NULL!	#NULL!	#NULL!	#NULL!	#NULL!	#NULL!	#NULL!	#NULL!	#NULL!	#NULL!	#NULL!	#NULL!	#NULL!	#NULL!	#NULL!	#NULL!	#NULL!	#NULL!	#NULL!	#NULL!	#NULL!	#NULL!	#NULL!	#NULL!	#NULL!	#NULL!	#NULL!	#NULL!	#NULL!	#NULL!	#NULL!	#NULL!	#NULL!	#NULL!	#NULL!	#NULL!	#NULL!	#NULL!	#NULL!	#NULL!
#NULL!	#NULL!	#NULL!	#NULL!	#NULL!	#NULL!	#NULL!	#NULL!	#NULL!	#NULL!	#NULL!	#NULL!	#NULL!	#NULL!	#NULL!	#NULL!	#NULL!	#NULL!	#NULL!	#NULL!	#NULL!	#NULL!	#NULL!	#NULL!	#NULL!	#NULL!	#NULL!	#NULL!	#NULL!	#NULL!	#NULL!	#NULL!	#NULL!	#NULL!	#NULL!	#NULL!	#NULL!	#NULL!	#NULL!	#NULL!	#NULL!	#NULL!	#NULL!	#NULL!	#NULL!	#NULL!	#NULL!	#NULL!	#NULL!	#NULL!
#NULL!	#NULL!	#NULL!	#NULL!	#NULL!	#NULL!	#NULL!	#NULL!	#NULL!	#NULL!	#NULL!	#NULL!	#NULL!	#NULL!	#NULL!	#NULL!	#NULL!	#NULL!	#NULL!	#NULL!	#NULL!	#NULL!	#NULL!	#NULL!	#NULL!	#NULL!	#NULL!	#NULL!	#NULL!	#NULL!	#NULL!	#NULL!	#NULL!	#NULL!	#NULL!	#NULL!	#NULL!	#NULL!	#NULL!	#NULL!	#NULL!	#NULL!	#NULL!	#NULL!	#NULL!	#NULL!	#NULL!	#NULL!	#NULL!	#NULL!
#NULL!	#NULL!	#NULL!	#NULL!	#NULL!	#NULL!	#NULL!	#NULL!	#NULL!	#NULL!	#NULL!	#NULL!	#NULL!	#NULL!	#NULL!	#NULL!	#NULL!	#NULL!	#NULL!	#NULL!	#NULL!	#NULL!	#NULL!	#NULL!	#NULL!	#NULL!	#NULL!	#NULL!	#NULL!	#NULL!	#NULL!	#NULL!	#NULL!	#NULL!	#NULL!	#NULL!	#NULL!	#NULL!	#NULL!	#NULL!	#NULL!	#NULL!	#NULL!	#NULL!	#NULL!	#NULL!	#NULL!	#NULL!	#NULL!	#NULL!
#NULL!	#NULL!	#NULL!	#NULL!	#NULL!	#NULL!	#NULL!	#NULL!	#NULL!	#NULL!	#NULL!	#NULL!	#NULL!	#NULL!	#NULL!	#NULL!	#NULL!	#NULL!	#NULL!	#NULL!	#NULL!	#NULL!	#NULL!	#NULL!	#NULL!	#NULL!	#NULL!	#NULL!	#NULL!	#NULL!	#NULL!	#NULL!	#NULL!	#NULL!	#NULL!	#NULL!	#NULL!	#NULL!	#NULL!	#NULL!	#NULL!	#NULL!	#NULL!	#NULL!	#NULL!	#NULL!	#NULL!	#NULL!	#NULL!	#NULL!
#NULL!	#NULL!	#NULL!	#NULL!	#NULL!	#NULL!	#NULL!	#NULL!	#NULL!	#NULL!	#NULL!	#NULL!	#NULL!	#NULL!	#NULL!	#NULL!	#NULL!	#NULL!	#NULL!	#NULL!	#NULL!	#NULL!	#NULL!	#NULL!	#NULL!	#NULL!	#NULL!	#NULL!	#NULL!	#NULL!	#NULL!	#NULL!	#NULL!	#NULL!	#NULL!	#NULL!	#NULL!	#NULL!	#NULL!	#NULL!	#NULL!	#NULL!	#NULL!	#NULL!	#NULL!	#NULL!	#NULL!	#NULL!	#NULL!	#NULL!
#NULL!	#NULL!	#NULL!	#NULL!	#NULL!	#NULL!	#NULL!	#NULL!	#NULL!	#NULL!	#NULL!	#NULL!	#NULL!	#NULL!	#NULL!	#NULL!	#NULL!	#NULL!	#NULL!	#NULL!	#NULL!	#NULL!	#NULL!	#NULL!	#NULL!	#NULL!	#NULL!	#NULL!	#NULL!	#NULL!	#NULL!	#NULL!	#NULL!	#NULL!	#NULL!	#NULL!	#NULL!	#NULL!	#NULL!	#NULL!	#NULL!	#NULL!	#NULL!	#NULL!	#NULL!	#NULL!	#NULL!	#NULL!	#NULL!	#NULL!
#NULL!	#NULL!	#NULL!	#NULL!	#NULL!	#NULL!	#NULL!	#NULL!	#NULL!	#NULL!	#NULL!	#NULL!	#NULL!	#NULL!	#NULL!	#NULL!	#NULL!	#NULL!	#NULL!	#NULL!	#NULL!	#NULL!	#NULL!	#NULL!	#NULL!	#NULL!	#NULL!	#NULL!	#NULL!	#NULL!	#NULL!	#NULL!	#NULL!	#NULL!	#NULL!	#NULL!	#NULL!	#NULL!	#NULL!	#NULL!	#NULL!	#NULL!	#NULL!	#NULL!	#NULL!	#NULL!	#NULL!	#NULL!	#NULL!	#NULL!
#NULL!	#NULL!	#NULL!	#NULL!	#NULL!	#NULL!	#NULL!	#NULL!	#NULL!	#NULL!	#NULL!	#NULL!	#NULL!	#NULL!	#NULL!	#NULL!	#NULL!	#NULL!	#NULL!	#NULL!	#NULL!	#NULL!	#NULL!	#NULL!	#NULL!	#NULL!	#NULL!	#NULL!	#NULL!	#NULL!	#NULL!	#NULL!	#NULL!	#NULL!	#NULL!	#NULL!	#NULL!	#NULL!	#NULL!	#NULL!	#NULL!	#NULL!	#NULL!	#NULL!	#NULL!	#NULL!	#NULL!	#NULL!	#NULL!	#NULL!
#NULL!	#NULL!	#NULL!	#NULL!	#NULL!	#NULL!	#NULL!	#NULL!	#NULL!	#NULL!	#NULL!	#NULL!	#NULL!	#NULL!	#NULL!	#NULL!	#NULL!	#NULL!	#NULL!	#NULL!	#NULL!	#NULL!	#NULL!	#NULL!	#NULL!	#NULL!	#NULL!	#NULL!	#NULL!	#NULL!	#NULL!	#NULL!	#NULL!	#NULL!	#NULL!	#NULL!	#NULL!	#NULL!	#NULL!	#NULL!	#NULL!	#NULL!	#NULL!	#NULL!	#NULL!	#NULL!	#NULL!	#NULL!	#NULL!	#NULL!
#NULL!	#NULL!	#NULL!	#NULL!	#NULL!	#NULL!	#NULL!	#NULL!	#NULL!	#NULL!	#NULL!	#NULL!	#NULL!	#NULL!	#NULL!	#NULL!	#NULL!	#NULL!	#NULL!	#NULL!	#NULL!	#NULL!	#NULL!	#NULL!	#NULL!	#NULL!	#NULL!	#NULL!	#NULL!	#NULL!	#NULL!	#NULL!	#NULL!	#NULL!	#NULL!	#NULL!	#NULL!	#NULL!	#NULL!	#NULL!	#NULL!	#NULL!	#NULL!	#NULL!	#NULL!	#NULL!	#NULL!	#NULL!	#NULL!	#NULL!
[truncated: 150 more columns]
